# Supplementary material
Source: MDPI journal article supplement (https://www.mdpi.com/2079-6412/11/5/542)
Supplement: s1 [file s1]

## Supplementary

Selected ZnO ALD thin films were investigated with helium ion microscopy (HIM). Samples were cleaved and imaged at 45° angle with 30 keV helium beam. Images of the ZnO films deposited with diethylzinc (DEZ) and normal water,  $^1\text{H}_2\text{O}$ , at different deposition temperatures are presented in Fig. S1. For comparison, similar images of the ZnO films deposited with heavy water,  $^2\text{H}_2\text{O}$ , are shown in Fig. S2.

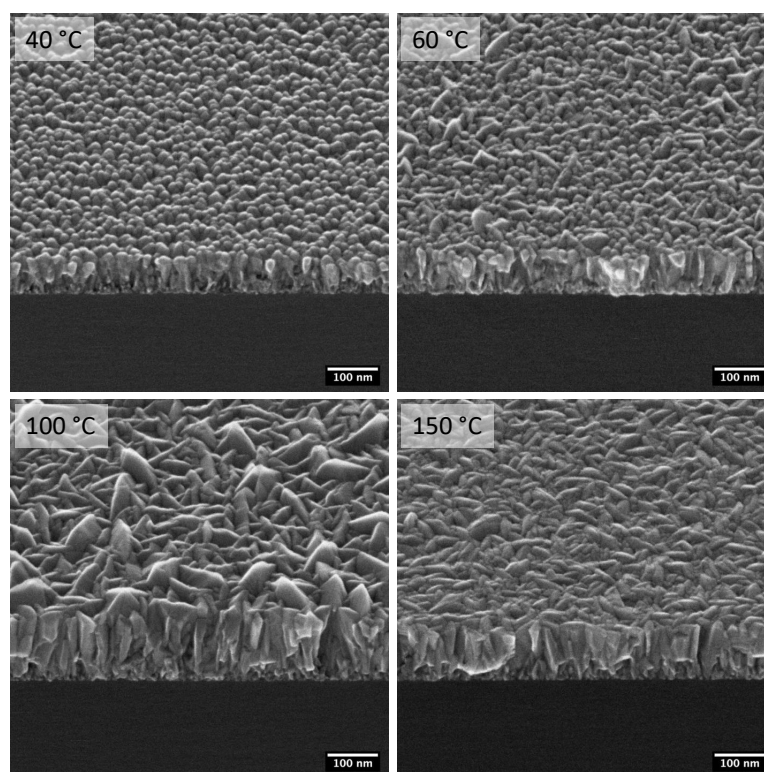

Figure S1: HIM images of the cleaved ZnO films on top of the Si-substrate deposited with DEZ and  $^1\text{H}_2\text{O}$  at different deposition temperatures.

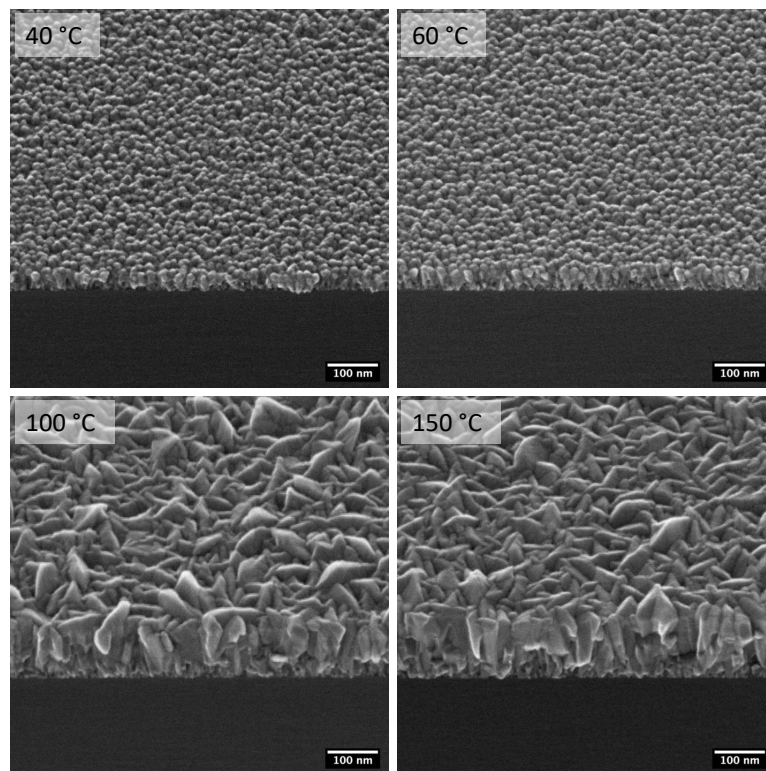

Figure S2: HIM images of the cleaved ZnO films on top of the Si-substrate deposited with DEZ and  $^2\text{H}_2\text{O}$  at different deposition temperatures.
